# Supplementary material for: Feasibility of Using Carvacrol/Starch Edible Coatings to Improve the Quality of Paipa Cheese
Source: MDPI journal article supplement (doi:10.3390/polym13152516), 2021-07-30
Supplement: s1 [file s1]

## **Feasibility of Using Carvacrol/Starch Edible Coatings to Improve the Quality of Paipa Cheese**

**Alex López Córdoba \***

Grupo de Investigación en Bioeconomía y Sostenibilidad Agroalimentaria. Universidad Pedagógica y Tecnológica de Colombia. Facultad Seccional Duitama. Escuela de Administración de Empresas Agropecuarias. Carrera 18 con Calle 22 Duitama, Boyacá, Colombia.

\* Correspondence: alex.lopez01@uptc.edu.co; Tel.: +57-8 7604100.

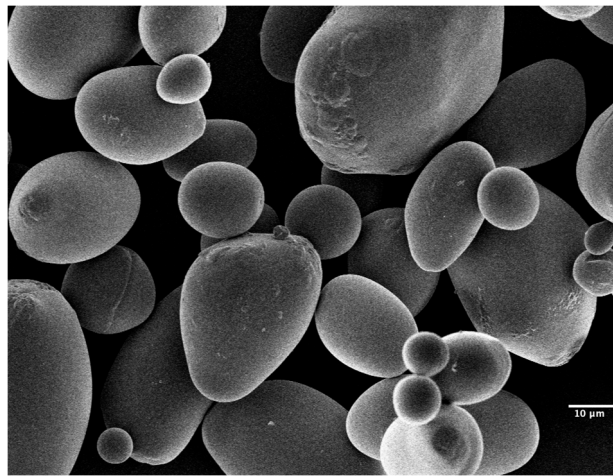

**Figure S1.** SEM image of the starch granules isolated from isolated from fresh potato tubers variety Diacol Capiro

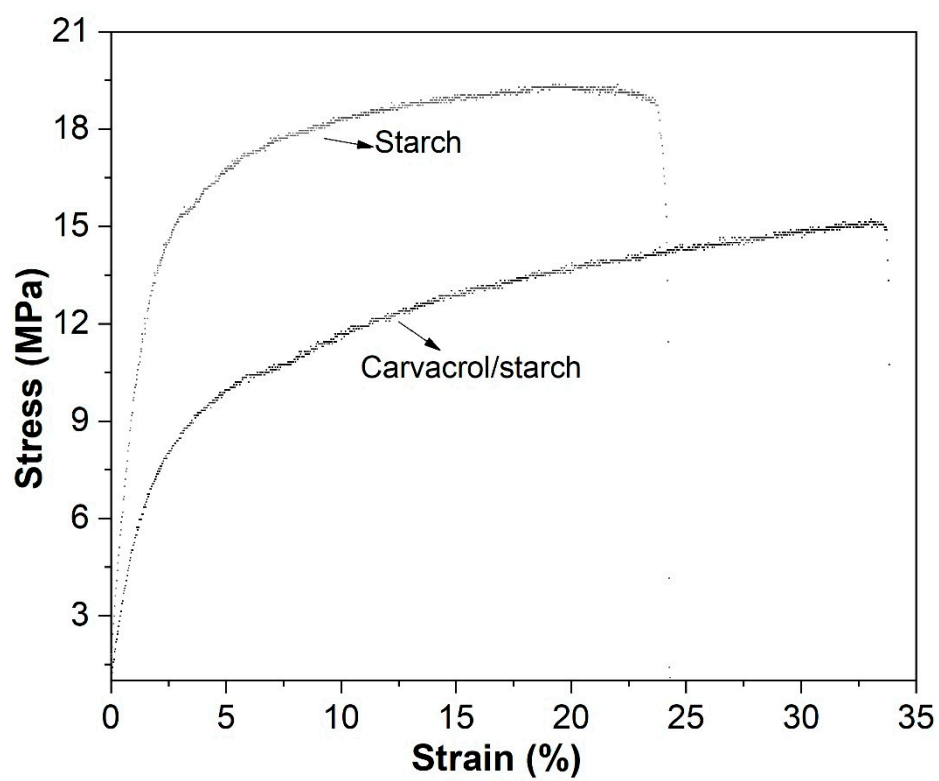

**Figure S2.** Stress-strain curves for Starch and Starch/Carvacrol films

**Table S1.** Characteristics of the starches isolated from potato tubers variety Diacol Capiro.

| Characteristic         | Value      |
|------------------------|------------|
| Extraction Yield (%)   | 12.0± 1.3  |
| Amylose Content (%)    | 18.5 ± 1.3 |
| Mean Granule Size (µm) | 17.9 ± 0.7 |
| Shape Description      | Ellipsoid  |
| Moisture Content (%)   | 15.2±0.5   |
